# Supplementary material for: Floral Color, Anthocyanin Synthesis Gene Expression and Control in Cape Erica Species
Source: PubMed Central journal article supplement (PMC6892755; doi:10.3389/fpls.2019.01565), 2019-11-28

# RT-qPCR results for all *Erica* species tested

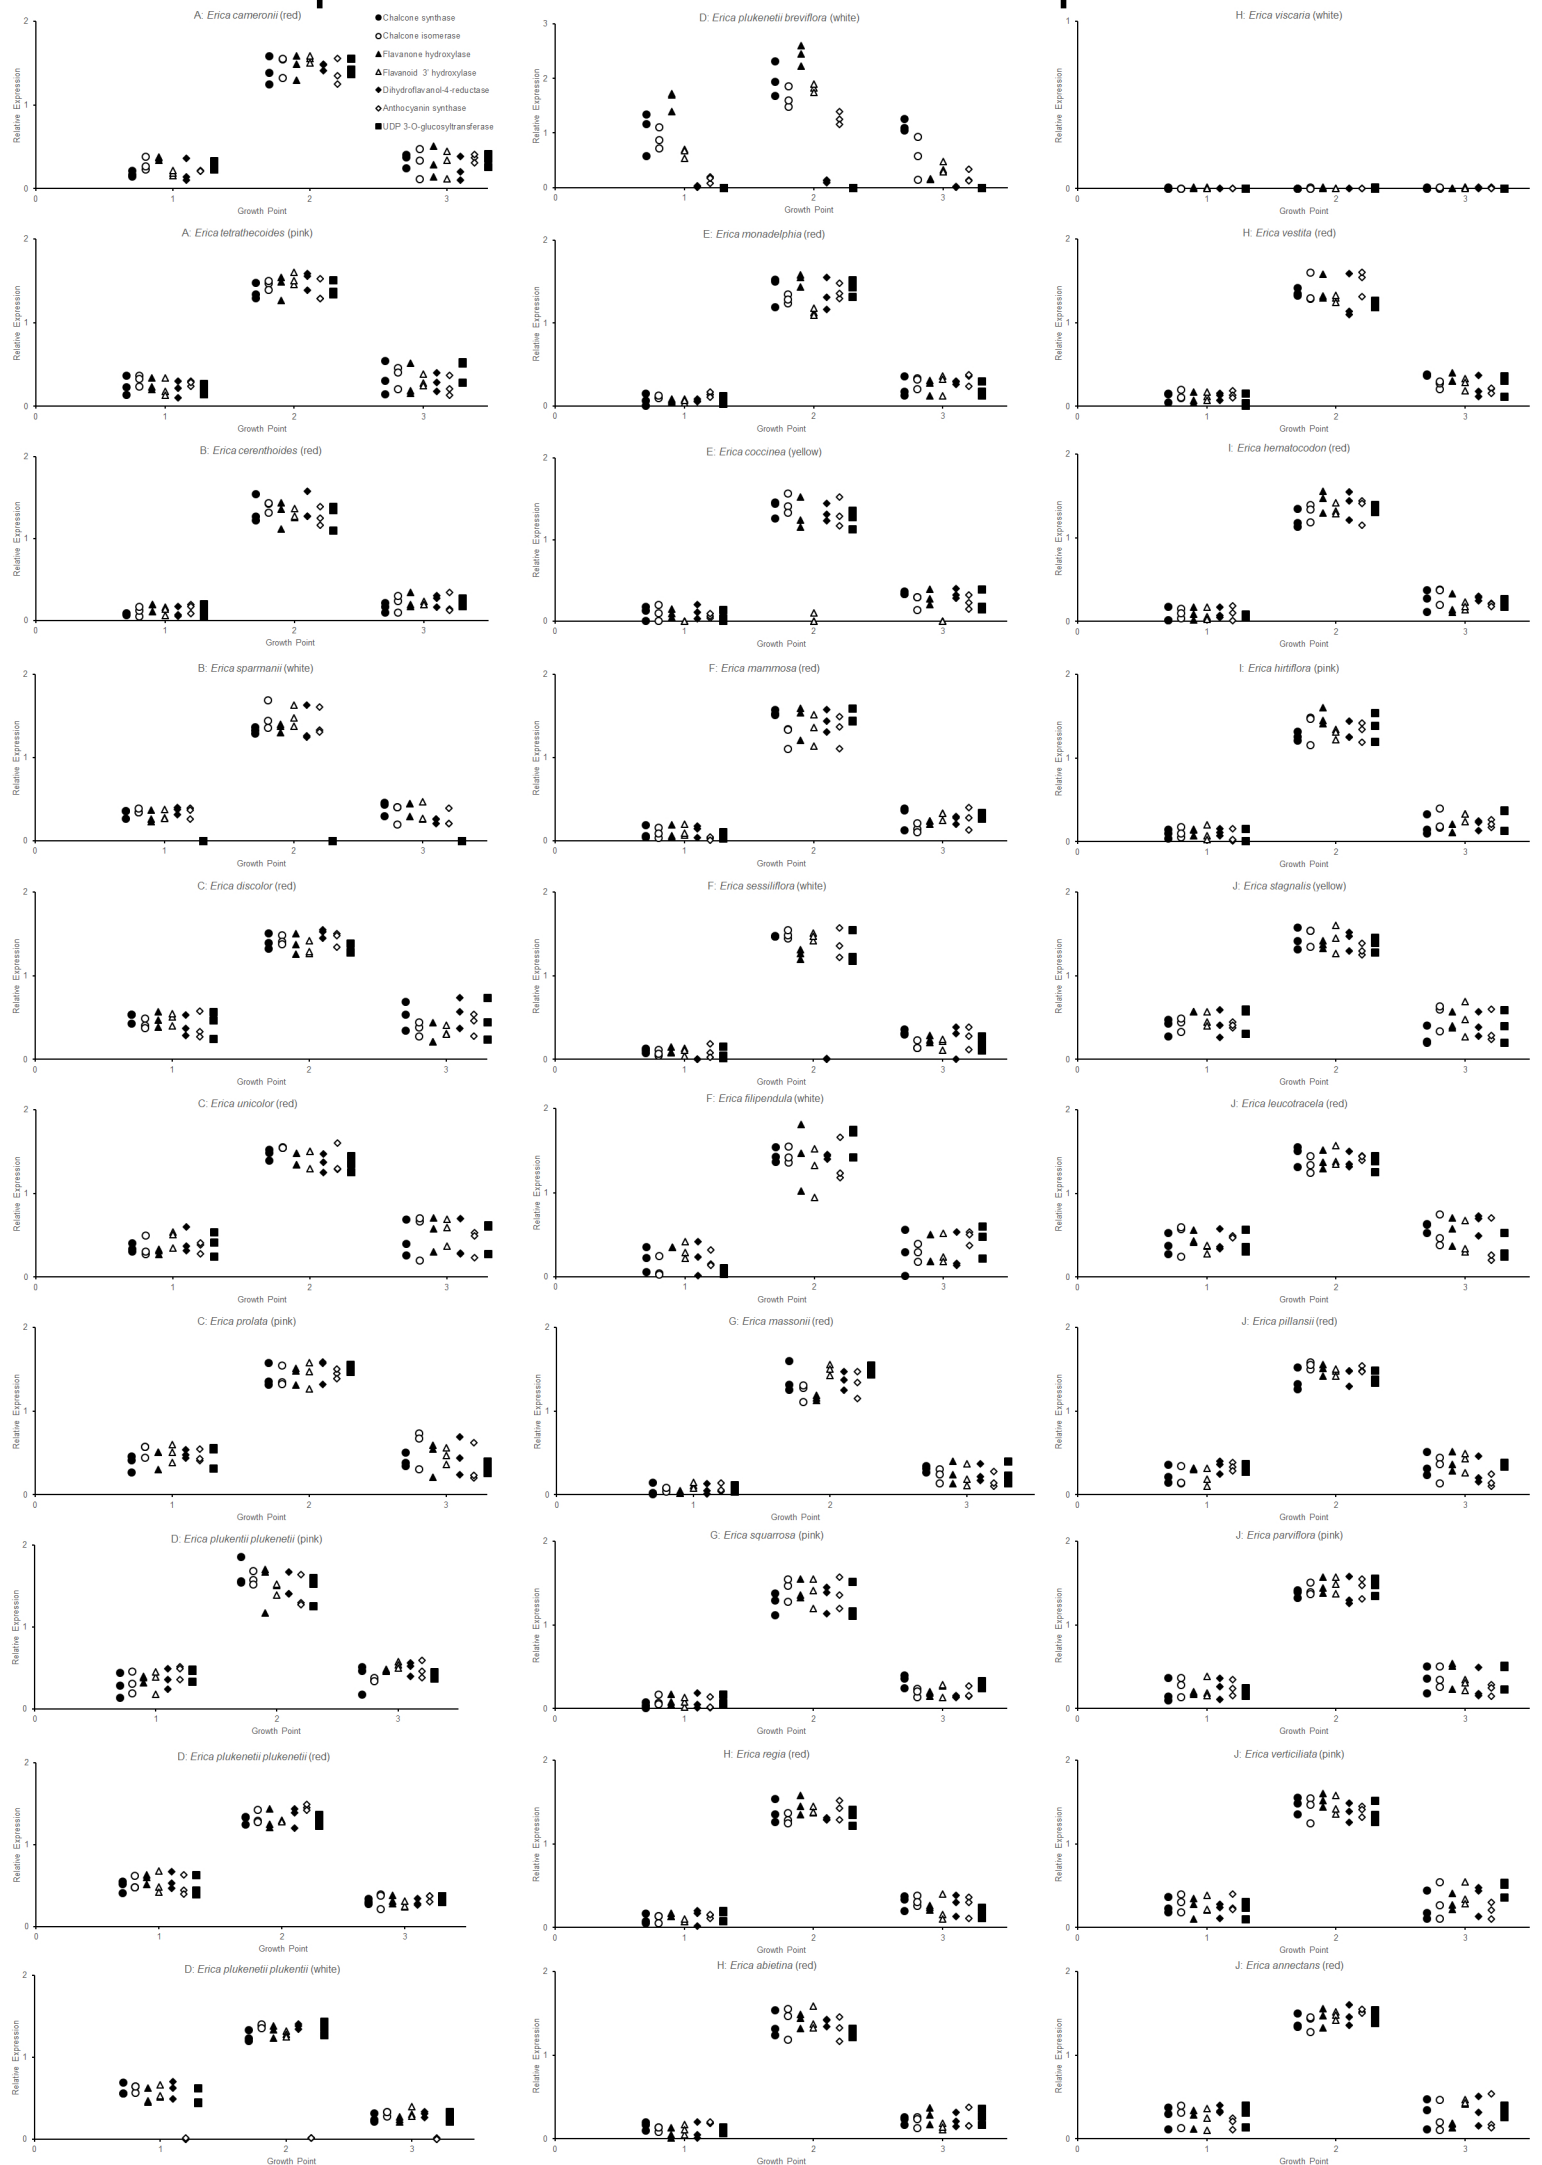

Supplement: DataSheet_1.pdf [file DataSheet_1.pdf]
