# Supplementary material for: Floral Color, Anthocyanin Synthesis Gene Expression and Control in Cape Erica Species
Source: PubMed Central journal article supplement (PMC6892755; doi:10.3389/fpls.2019.01565), 2019-11-28

Results of the UPLC-MS/MS analyses on *Erica* sp. floral tissue of various colours

- 1.) Dihydrokaempferol 289.1
- 2.) Quercetin hexoside 463.1
- 3.) Quercetin rhamnoside 447.1
- 4.) Cyanidin hexoside 449.1
- 5.) Pelargonidin pentose 433.1
- 6.) Quercetin 305.1
- 7.) Procyanidin
- 8.) Pelargonidin glucoside
- 9.) Kaempferol pentose
- 10.) Cyanidin

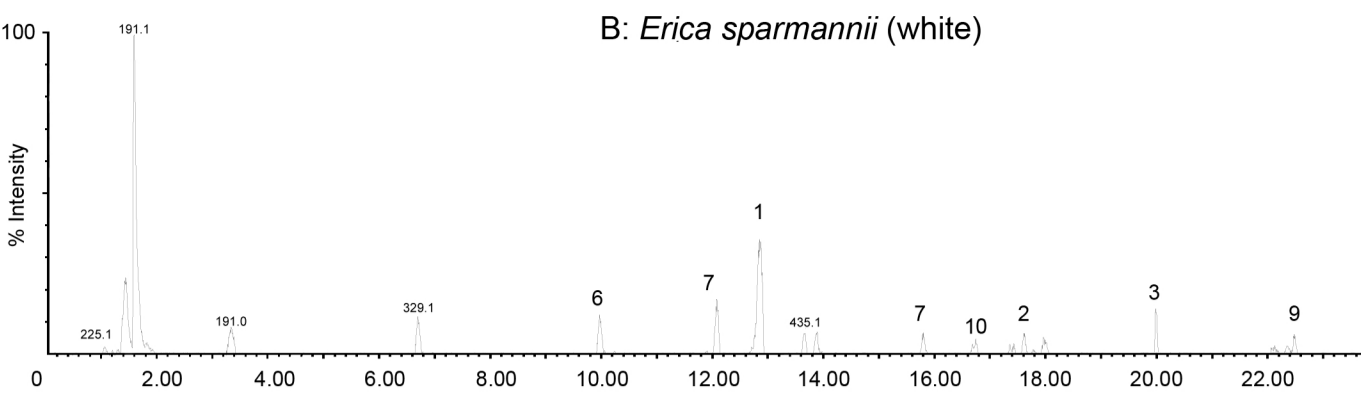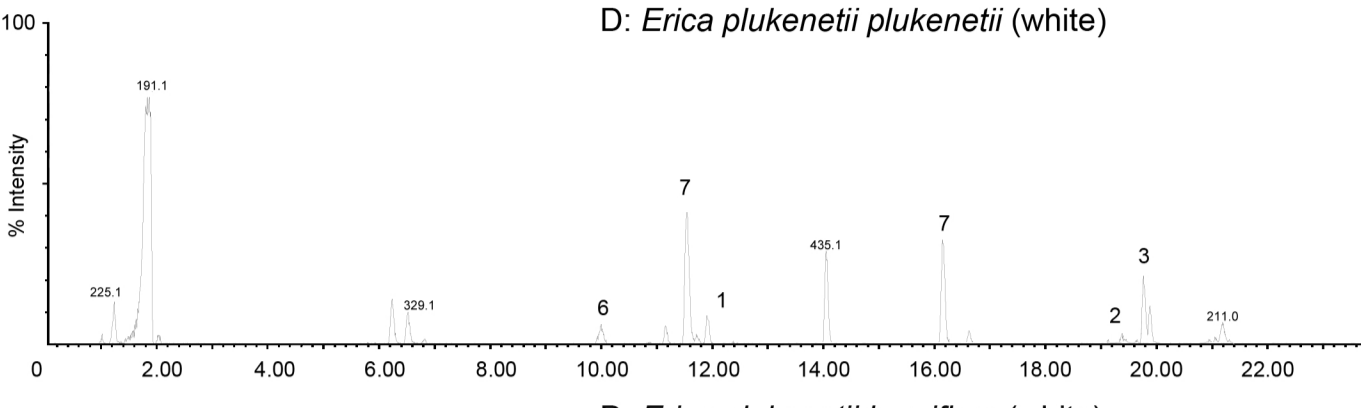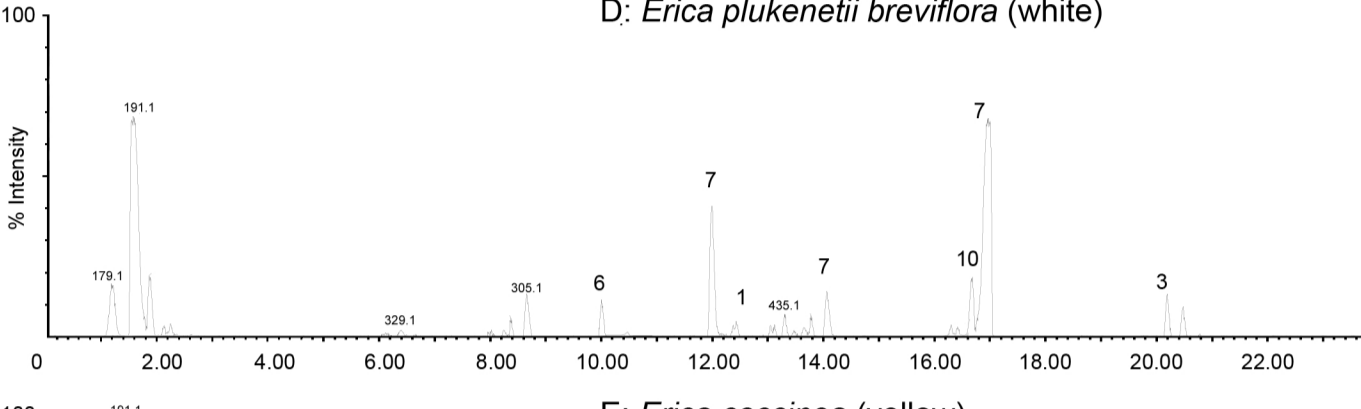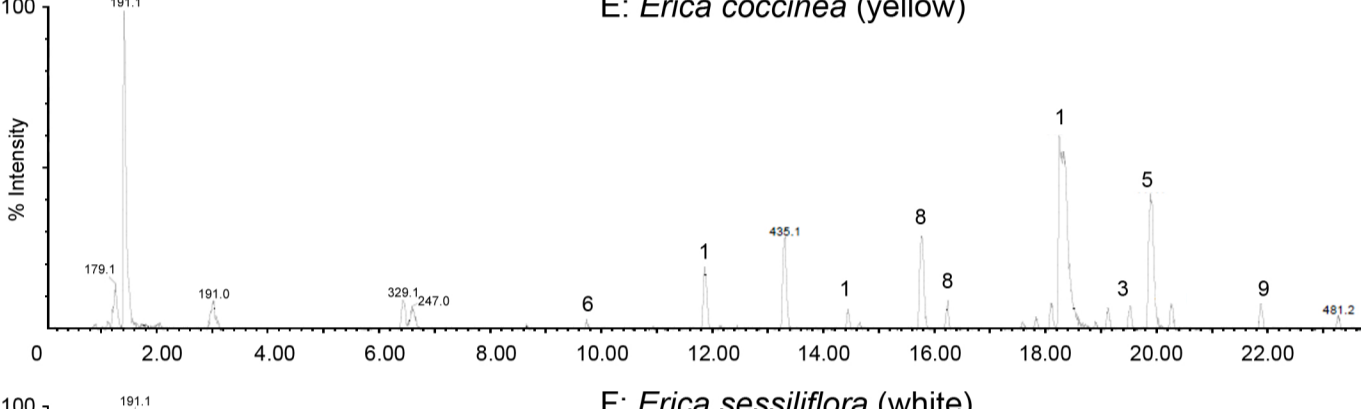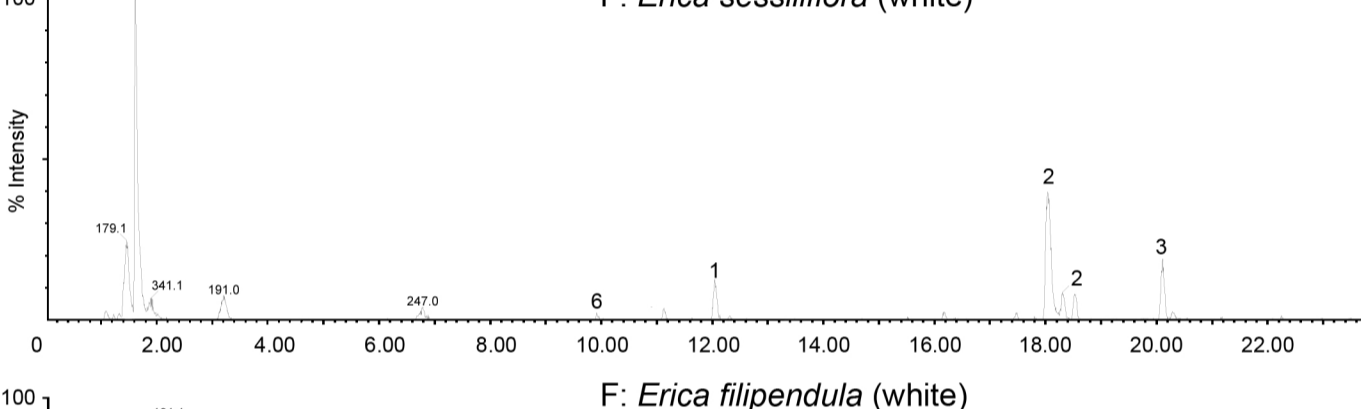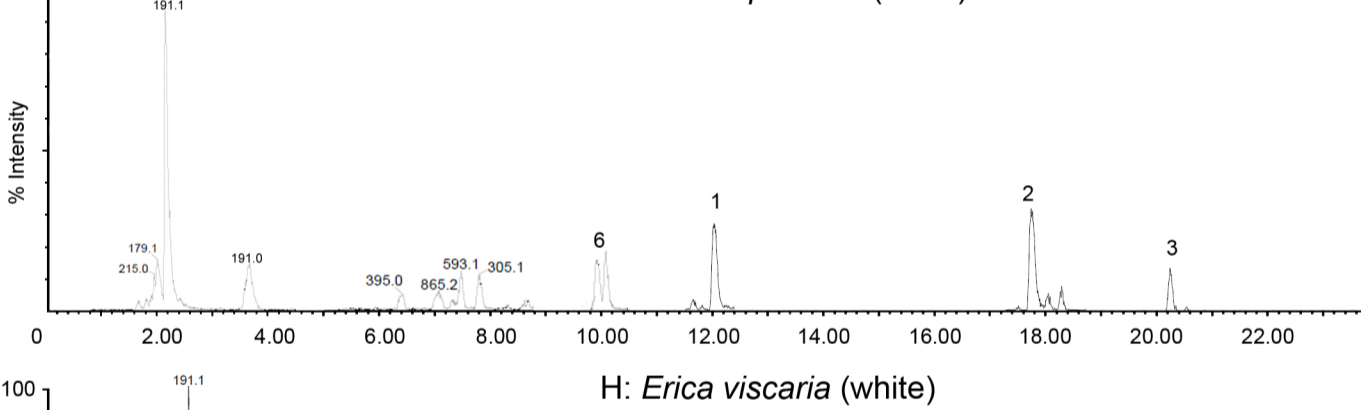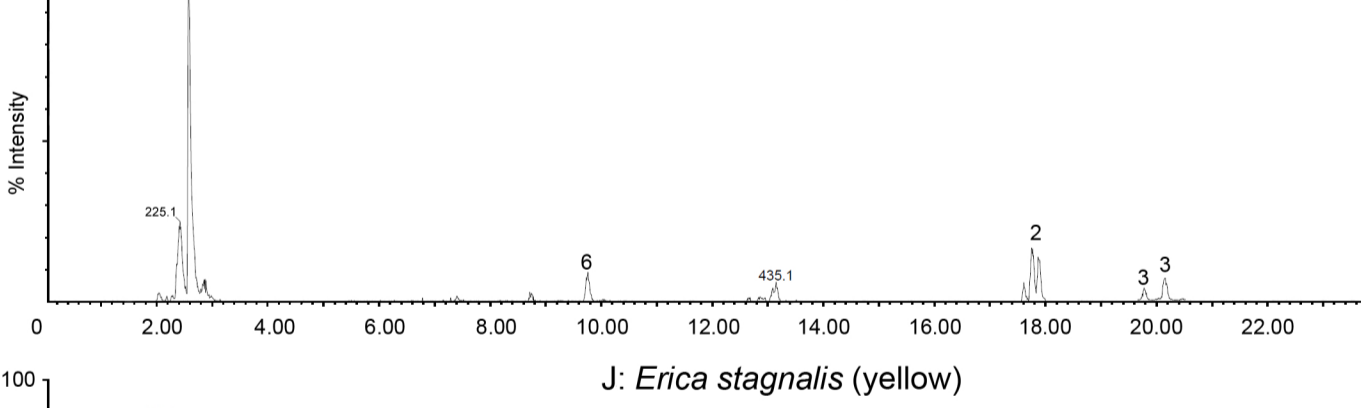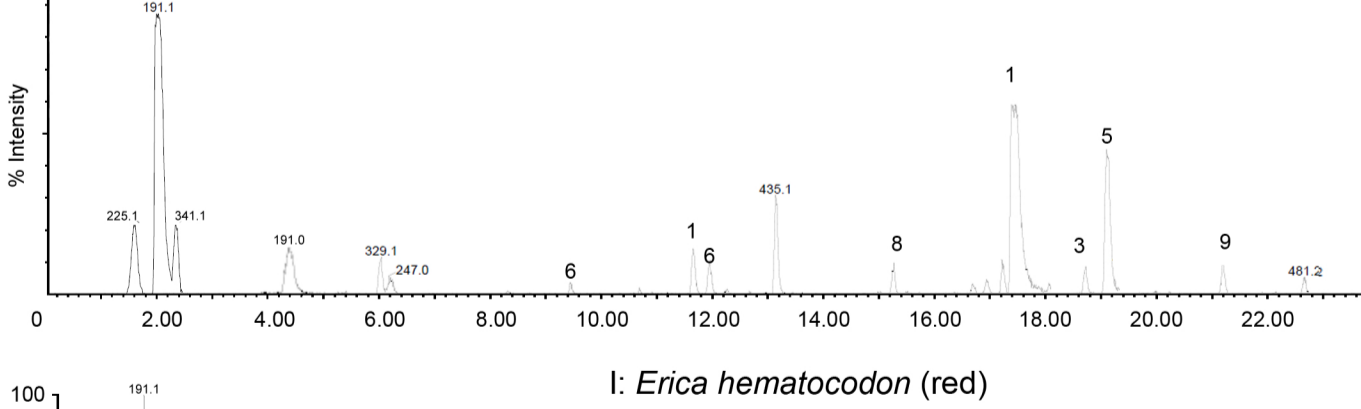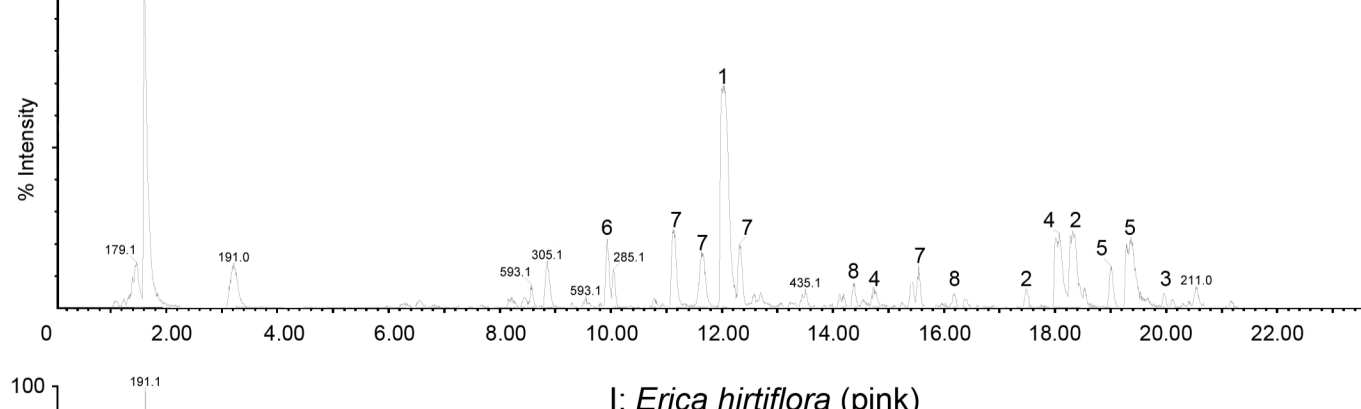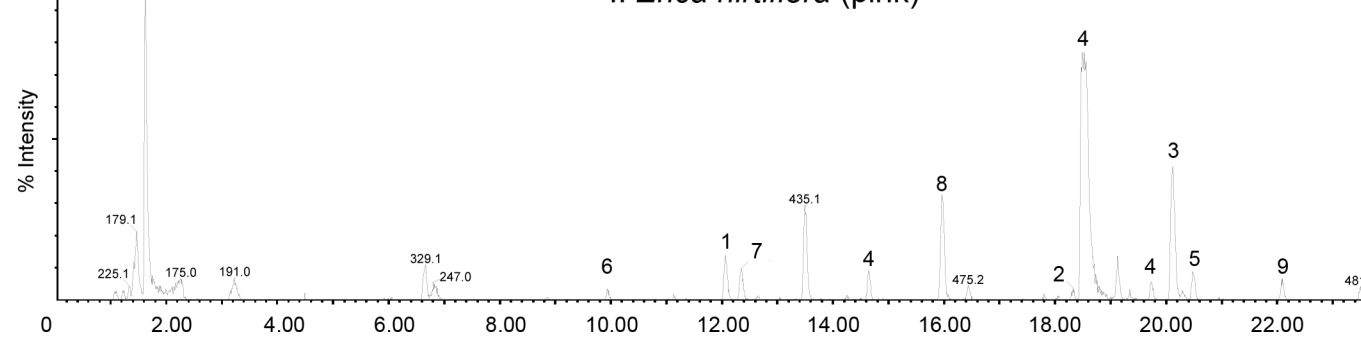

Supplement: DataSheet_2.pdf [file DataSheet_2.pdf]
